# Supplementary material for: Pt(ii) complex containing the 1R,2R enantiomer of trans-1,2-diamino-4-cyclohexene ligand effectively and selectively inhibits the viability of aggressive pancreatic adenocarcinoma cells and alters their lipid metabolism
Source: Royal Society of Chemistry journal article supplement (doi:10.1039/d2qi00778a), 2022-01-01
Supplement: d2qi00778a1.pdf [file d2qi00778a1.pdf]

## Supporting Information

for

### **Pt(II) complex containing the 1*R*,2*R* enantiomer of *trans*-1,2-diamino-4-cyclohexene ligand effectively and selectively inhibits the viability of highly aggressive pancreatic adenocarcinoma cells and alters their lipid metabolism**

Vojtech Novohradsky,<sup>a</sup> Lenka Markova,<sup>a</sup> Hana Kostrhunova,<sup>a</sup> Marie Svitelova,<sup>a</sup> Jana Kasparkova,<sup>a,b</sup> Alessandra Barbanente,<sup>c</sup> Paride Papadia,<sup>d</sup> Nicola Margiotta,<sup>c</sup> James D. Hoeschele,<sup>c</sup> and Viktor Brabec<sup>\*,a</sup>

<sup>a</sup> Czech Academy of Sciences, Institute of Biophysics, Kralovopolska 135, CZ-61265 Brno, Czech Republic

<sup>b</sup> Dipartimento di Chimica, Università degli Studi di Bari Aldo Moro, Via Orabona, 4, I-70125 Bari, Italy

<sup>c</sup> Department of Biological and Environmental Sciences and Technologies (DiSTeBA), University of Salento, 73100 Lecce, Italy

<sup>d</sup> Department of Chemistry, Eastern Michigan University, Ypsilanti, MI 48197, USA

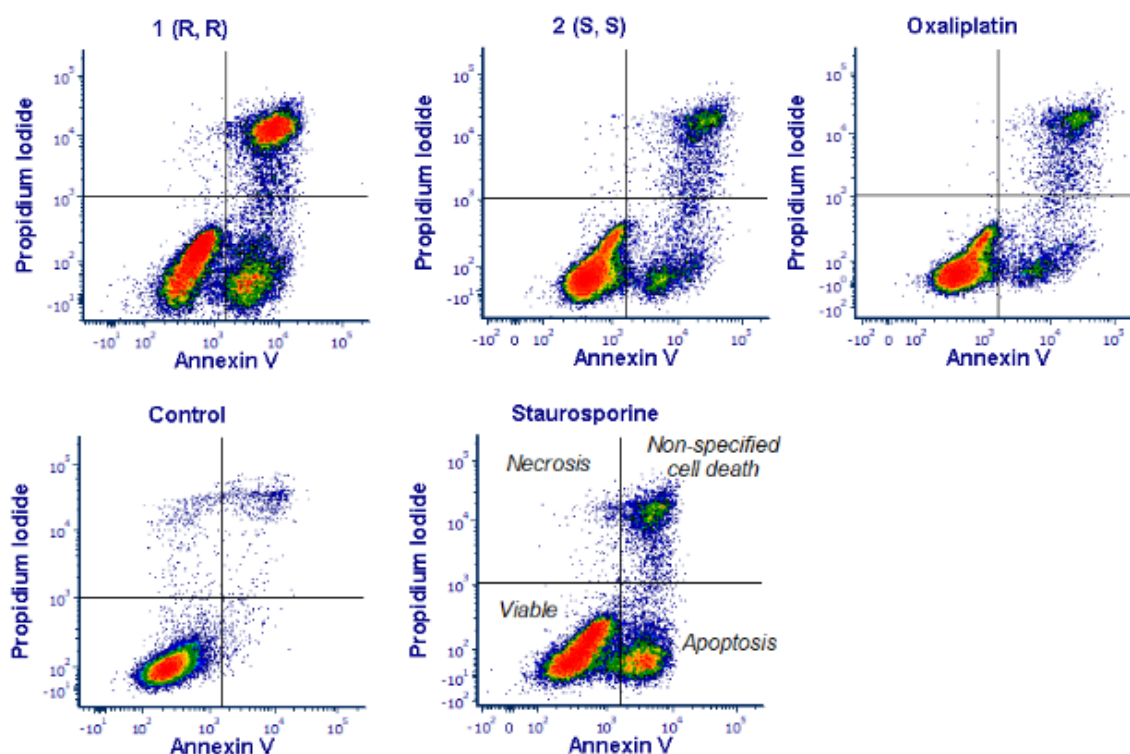

**Fig. S1** Cell death detection in PSN1 cells treated with **1**, **2**, and oxaliplatin by the Annexin-V/propidium iodide assay and analyzed by flow cytometry. Cells were treated with the investigated compounds at the concentration corresponding to their IC<sub>50,72 h</sub>. Density plots are the representatives of four independent experiments. Positive control for apoptosis - staurosporine was also applied at the concentration of 1  $\mu$ M for 3 h before analysis. Thirty thousand events corresponding to single cells were analyzed. The viable cells (lower left quadrant), early apoptotic (lower right quadrant), necrotic (upper left quadrant), non-specified cell death - late necrotic and late apoptotic cells (upper right quadrant).
